# Supplementary material for: Comparative Effectiveness Study of Home-Based Interventions to Prevent CA-MRSA Infection Recurrence
Source: MDPI journal article supplement (doi:10.3390/antibiotics10091105), 2021-09-13
Supplement: s1 [file s1]

## Supplementary Materials

Table S1. Abbreviations Used.

| <u>Acronym</u> | <u>Definition</u>                                                       |
|----------------|-------------------------------------------------------------------------|
| AIDS           | Acquired Immunodeficiency Syndrome                                      |
| CA-MRSA        | Community-Associated Methicillin-Resistant <i>Staphylococcus Aureus</i> |
| CA-MSSA        | Community-Associated Methicillin-Sensitive <i>Staphylococcus Aureus</i> |
| CAMP1          | Community-Acquired MRSA Project                                         |
| CBPR           | Community-based Participatory Research                                  |
| CDN            | Clinical Directors Network                                              |
| CHW            | Community Health Workers                                                |
| CLSI           | Clinical and Laboratory Standards Institute                             |
| CON            | Control Group                                                           |
| COPD           | Chronic Obstructive Pulmonary Disease                                   |
| CVA            | Cerebrovascular Accident                                                |
| ED             | Emergency Department                                                    |
| EHR            | Electronic Health Record                                                |
| ER             | Emergency Room                                                          |
| EXP            | Experimental Group                                                      |
| FQHC           | Federally Qualified Health Center                                       |
| HA-MRSA        | Healthcare-Associated MRSA                                              |
| HTE            | Heterogeneity of Treatment Effects                                      |
| HIV            | Human Immunodeficiency Virus                                            |
| I&D            | Incision and Drainage                                                   |
| ICU            | Intensive Care Unit                                                     |
| ITT            | Intent to Treat                                                         |
| MNAR           | Missing Not at Random                                                   |
| MRSA           | Methicillin-Resistant <i>Staphylococcus aureus</i>                      |
| PBRN           | Practice-based Research Network                                         |
| QoL            | Quality of Life                                                         |
| RCT            | Randomized Clinical Trial                                               |
| SSTI           | Skin and Soft Tissue Infection                                          |
| TIA            | Transient Ischemic Attack                                               |
| UC             | Usual Care                                                              |

**Table S2.** Characteristics of consented participants who completed the baseline home visit (T1) versus patients who did not complete the baseline home visit (T1).

| Variable                  | Completed T1       |                 |                | Did Not Complete T1 |                 |             | p-Value |
|---------------------------|--------------------|-----------------|----------------|---------------------|-----------------|-------------|---------|
|                           | (n = 119)          |                 |                | (n = 66)            |                 |             |         |
|                           | TOTAL<br>(n = 119) | EXP<br>(n = 63) | UC<br>(n = 56) | TOTAL<br>(n = 66)   | EXP<br>(n = 33) | UC (n = 33) |         |
| Age                       |                    |                 |                |                     |                 |             |         |
| Mean age (SD)             | 38.1 (14.9)        | 39.5<br>(15.4)  | 36.5<br>(14.4) | 40.7<br>(17.4)      | 42.4<br>(17.3)  | 39.0 (17.6) | 0.29    |
| Median                    | 37.0               | 38.0            | 36.0           | 40.5                | 45.0            | 35.2        |         |
| IQR                       | 27, 51             | 27, 54          | 27, 48         | 25.4, 54.8          | 27.6,<br>58.8   | 24.3, 52.5  |         |
| Gender, n (%)             |                    |                 |                |                     |                 |             |         |
| Female                    | 47 (39.5)          | 22 (34.9)       | 25 (44.6)      | 20 (30.3)           | 13 (39.4)       | 7 (21.2)    | 0.21    |
| Male                      | 72 (60.5)          | 41 (65.1)       | 31 (55.4)      | 46 (69.7)           | 20 (60.6)       | 26 (78.8)   |         |
| Ethnicity:                |                    |                 |                |                     |                 |             |         |
| Hispanic/Latino, n (%)    | 72 (64.9)          | 37 (62.7)       | 35 (67.3)      | 18 (69.2)           | 10 (71.4)       | 9 (64.3)    | 0.91    |
| Race, n (%)               |                    |                 |                |                     |                 |             |         |
| Black/African American    | 27 (22.7)          | 14 (22.2)       | 13 (23.2)      | 14 (21.2)           | 10 (30.3)       | 4 (12.1)    | <0.0001 |
| White American            | 22 (18.5)          | 13 (20.6)       | 9 (16.1)       | 6 (9.1)             | 3 (9.1)         | 3 (9.1)     |         |
| Indian/Alaska Native      | 1 (0.8)            | 0 (0)           | 1 (1.8)        | 1 (1.5)             | 0 (0)           | 1 (3.0)     |         |
| Asian                     | 0 (0)              | 0 (0)           | 0 (0)          | 2 (3.0)             | 2 (6.1)         | 0 (0)       |         |
| More than one race/Other  | 21 (17.6)          | 11 (17.5)       | 10 (17.9)      | 17 (25.8)           | 6 (18.2)        | 11 (33.3)   |         |
| Did not Report            | 48 (40.3)          | 25 (39.7)       | 23 (41.1)      | 26 (39.4)           | 12 (36.4)       | 14 (42.4)   |         |
| Baseline MRSA/MSSA        |                    |                 |                |                     |                 |             |         |
| MRSA+                     | 59 (50.0)          | 41 (66.1)       | 18 (32.1)      | 35 (53.0)           | 19 (57.6)       | 16 (48.5)   | 0.65    |
| MSSA+                     | 59 (50.0)          | 21 (33.9)       | 38 (67.9)      | 33 (50.0)           | 15 (45.4)       | 18 (55.6)   | 0.96    |
| Incision & Drainage (I&D) | 70 (61.9)          | 34 (56.7)       | 36 (67.9)      | 37 (60.7)           | 18 (58.1)       | 19 (63.3)   | 0.87    |

| Recruitment Site: ED vs. FQHC |             |            |            |            |            |            |      |
|-------------------------------|-------------|------------|------------|------------|------------|------------|------|
| ED                            | 102 (85.7)  | 54 (85.7)  | 85.71 (48) | 57 (86.4)  | 54 (85.7)  | 48 (85.7)  | 0.90 |
| FQHC                          | 17 (14.3)   | 9 (14.3)   | 14.29 (8)  | 9 (13.6)   | 9 (14.3)   | 8 (14.3)   |      |
| Lesion Location               |             |            |            |            |            |            |      |
| Abdomen/Torso                 | 7.56 (9)    | 6.35 (4)   | 8.93 (5)   | 16.67 (11) | 15.15 (5)  | 18.18 (6)  | 0.72 |
| Arm                           | 6.72 (8)    | 7.94 (5)   | 5.36 (3)   | 4.55 (3)   | 3.03 (1)   | 6.06 (2)   |      |
| Axilla                        | 16.81 (20)  | 15.87 (10) | 17.86 (10) | 9.09 (6)   | 15.15 (5)  | 3.03 (1)   |      |
| Back                          | 3.36 (4)    | 3.17 (2)   | 3.53 (2)   | 4.55 (3)   | 6.06 (2)   | 3.03 (1)   |      |
| Breast                        | 0.84 (1)    | 1.59 (1)   | 0          | 0          | 0          | 0          |      |
| Buttock                       | 13.45 (16)  | 11.11 (7)  | 16.07 (9)  | 13.64 (9)  | 6.06 (2)   | 21.21 (7)  |      |
| Foot/Ankle                    | 12.61 (15)  | 9.52 (6)   | 16.07 (9)  | 13.64 (9)  | 15.15 (5)  | 12.12 (4)  |      |
| Groin                         | 4.20 (5)    | 3.17 (2)   | 5.36 (3)   | 1.52 (1)   | 0          | 3.03 (1)   |      |
| Hand/Finger                   | 8.40 (10)   | 7.94 (4)   | 8.93 (5)   | 7.58 (5)   | 12.12 (4)  | 3.03 (1)   |      |
| Head/Neck                     | 8.40 (10)   | 9.52 (6)   | 7.14 (4)   | 10.61 (7)  | 9.09 (3)   | 12.12 (4)  |      |
| Lower Leg                     | 9.24 (11)   | 14.29 (9)  | 3.57 (2)   | 12.12 (8)  | 9.09 (3)   | 15.15 (5)  |      |
| Thigh                         | 8.40 (10)   | 9.52 (6)   | 7.14 (4)   | 6.06 (4)   | 9.09 (3)   | 3.03 (1)   |      |
| Lesion Size                   |             |            |            |            |            |            |      |
| 0–5 cm                        | 90.76 (108) | 87.30 (55) | 94.64 (53) | 80.30 (53) | 76.79 (26) | 81.82 (27) | 0.13 |
| >5 to 10 cm                   | 6.72 (8)    | 9.52 (6)   | 3.57 (2)   | 18.18 (12) | 21.21 (7)  | 15.15 (5)  |      |
| >10 to 15 cm                  | 1.68 (2)    | 3.17 (2)   | 0          | 1.52 (1)   | 0          | 3.03 (1)   |      |
| over 15 cm                    | 0.84 (1)    | 0          | 1.79 (1)   | 0          | 0          | 0          |      |
| Signs and Symptoms of SSTI    |             |            |            |            |            |            |      |
| Redness                       | 109 (91.6)  | 58 (92.1)  | 51 (91.1)  | 60 (90.9)  | 29 (87.9)  | 31 (93.9)  | 0.87 |
| Swelling                      | 107 (89.9)  | 56 (88.9)  | 51 (91.1)  | 59 (89.4)  | 33 (84.9)  | 31 (93.9)  | 0.91 |

|                                                             |            |           |           |           |           |            |       |
|-------------------------------------------------------------|------------|-----------|-----------|-----------|-----------|------------|-------|
| <b>Warmth</b>                                               | 91 (76.5)  | 49 (77.8) | 42 (75.0) | 49 (74.2) | 20 (60.6) | 29 (87.9)  | 0.74  |
| <b>Pain/Tenderness</b>                                      | 110 (92.4) | 59 (93.7) | 51 (91.1) | 61 (92.4) | 30 (90.9) | 31 (93.9)  | 0.998 |
| <b>Complaint of<br/>“Spider Bite”</b>                       | 5 (4.2)    | 4 (6.4)   | 1 (1.8)   | 0 (0)     | 0 (0)     | 0 (0)      | 0.09  |
| <b>Redness</b>                                              | 109 (91.6) | 58 (92.1) | 51 (91.1) | 60 (90.9) | 29 (87.9) | 31 (93.9)  | 0.87  |
| <b>Lesion Type</b>                                          |            |           |           |           |           |            |       |
| <b>Folliculitis</b>                                         | 10 (8.4)   | 6 (9.5)   | 4 (7.1)   | 8 (12.1)  | 3 (9.1)   | 5 (15.2)   |       |
| <b>Abscess</b>                                              | 92 (77.3)  | 46 (73.0) | 46 (82.1) | 50 (75.8) | 24 (72.7) | 26 (78.8)  |       |
| <b>Furuncle/Boil</b>                                        | 5 (4.2)    | 2 (3.2)   | 3 (5.4)   | 3 (4.6)   | 1 (3.0)   | 2 (6.1)    | 0.68  |
| <b>Carbuncle</b>                                            | 4 (3.4)    | 1 (1.6)   | 3 (5.4)   | 2 (3.0)   | 1 (3.0)   | 1 (3.0)    |       |
| <b>Cellulitis</b>                                           | 23.53 (28) | 18 (28.6) | 10 (17.9) | 20 (30.3) | 9 (27.3)  | 33.33 (11) |       |
| <b>Purulence</b>                                            |            |           |           |           |           |            |       |
| <b>Fluctuance</b>                                           | 72 (60.5)  | 33 (52.9) | 39 (69.6) | 40 (60.6) | 17 (51.5) | 23 (69.7)  |       |
| <b>Yellow/White Center</b>                                  | 44 (37.0)  | 21 (33.3) | 23 (41.1) | 37 (56.1) | 16 (48.5) | 21 (63.6)  |       |
| <b>Central Point or<br/>Head</b>                            | 45 (37.8)  | 21 (33.3) | 24 (42.9) | 32 (48.5) | 15 (45.5) | 17 (51.5)  | 0.43  |
| <b>Draining Pus</b>                                         | 62 (52.1)  | 32 (50.8) | 30 (53.6) | 35 (53.0) | 16 (48.5) | 19 (57.6)  |       |
| <b>Possible to aspirate<br/>with needle and<br/>syringe</b> | 24 (20.2)  | 9 (14.3)  | 15 (26.8) | 11 (16.7) | 5 (15.2)  | 6 (18.2)   |       |
| <b>Follow-up Visit</b>                                      |            |           |           |           |           |            |       |
| <b>Yes</b>                                                  | 99 (88.4)  | 51 (87.9) | 48 (88.9) | 54 (88.5) | 27 (87.1) | 27 (90.0)  | 0.98  |
| <b>Treatment</b>                                            |            |           |           |           |           |            |       |
| <b>Incision and<br/>Drainage</b>                            | 73 (61.9)  | 35 (56.5) | 38 (67.9) | 37 (60.7) | 18 (58.1) | 19 (63.3)  |       |
| <b>Antibiotic<br/>prescription, any<br/>type</b>            | 102 (86.4) | 54 (87.1) | 48 (85.7) | 56 (84.9) | 28 (84.9) | 28 (84.9)  | 0.94  |
| <b>Both</b>                                                 | 61 (51.7)  | 29 (46.8) | 32 (57.1) | 33 (48.5) | 16 (48.5) | 16 (48.5)  |       |

---

|                           |           |           |           |           |          |          |      |
|---------------------------|-----------|-----------|-----------|-----------|----------|----------|------|
| <b>Nasal Surveillance</b> |           |           |           |           |          |          |      |
| <b>MRSA+</b>              | 16 (19.5) | 8 (19.5)  | 8 (19.5)  | 12 (23.1) | 7 (26.9) | 5 (19.2) | 0.41 |
| <b>MSSA+</b>              | 33 (40.2) | 17 (41.5) | 16 (39.0) | 15 (28.9) | 9 (34.6) | 6 (23.1) |      |

---

**Table S3.** Demographics of participants who were followed-up vs. not followed-up.

|                                          | <b>FOLLOWED-UP<br/>(N = 92)</b> | <b>NOT<br/>FOLLOWED-UP<br/>(N = 28)</b> | <b>P-VALUE</b> |
|------------------------------------------|---------------------------------|-----------------------------------------|----------------|
| <b>MEAN AGE (SD)</b>                     | 38.9 (15.5)                     | 35.7 (12.6)                             | 0.31           |
| <b>GENDER, N (%)</b>                     |                                 |                                         |                |
| <b>FEMALE</b>                            | 36 (39.6)                       | 11 (37.9)                               | 1.00           |
| <b>MALE</b>                              | 55 (60.4)                       | 18 (62.1)                               |                |
| <b>ETHNICITY: HISPANIC/LATINO, N (%)</b> | 62 (72.1)                       | 10 (37.0)                               | 0.0006         |
| <b>RACE, N (%)</b>                       |                                 |                                         |                |
| <b>BLACK/AFRICAN<br/>AMERICAN</b>        | 17 (32.7)                       | 10 (52.6)                               | 0.32           |
| <b>WHITE<br/>AMERICAN</b>                | 16 (30.8)                       | 6 (31.6)                                |                |
| <b>INDIAN/ALASKA NATIVE</b>              | 1 (1.9)                         | 0 (0)                                   |                |
| <b>ASIAN</b>                             | 0 (0)                           | 0 (0)                                   |                |
| <b>MORE THAN ONE RACE/OTHER</b>          | 18 (34.6)                       | 3 (15.8)                                |                |
| <b>BASELINE MRSA/MSSA</b>                |                                 |                                         |                |
| <b>MRSA+</b>                             | 47 (51.7)                       | 12 (41.4)                               | 0.40           |
| <b>MSSA+</b>                             | 44 (48.4)                       | 17 (58.6)                               | 0.40           |
| <b>INCISION &amp; DRAINAGE (I&amp;D)</b> | 55 (64.0)                       | 15 (53.6)                               | 0.37           |
| <b>RECRUITED FROM ED VS. FQHC</b>        |                                 |                                         |                |
| <b>ED</b>                                | 76 (83.5)                       | 27 (93.1)                               | 0.24           |
| <b>FQHC</b>                              | 15 (16.5)                       | 2 (6.9)                                 |                |

**Table S4.** Microbiologic and dermatologic characteristics of study participants at baseline.

| <b>Dermatologic Characteristics</b> | <b>Total<br/>(n = 119)</b> | <b>Experimental<br/>(n = 63)</b> | <b>Usual Care<br/>(n = 56)</b> |
|-------------------------------------|----------------------------|----------------------------------|--------------------------------|
| <b>Wound, n (%)</b>                 |                            |                                  |                                |
| MRSA+                               | 59 (50.0)                  | 41 (66.1)                        | 18 (32.1)                      |
| MSSA+                               | 59 (50.0)                  | 21 (33.9)                        | 38 (67.9)                      |
| USA 300                             | 50 (42.4)                  | 32 (51.6)                        | 18 (32.1)                      |
| Non-USA 300                         | 51 (43.2)                  | 24 (38.7)                        | 27 (48.2)                      |
| <b>Nasal, n (%)</b>                 |                            |                                  |                                |
| MRSA+                               | 16 (19.5)                  | 8 (19.5)                         | 8 (19.5)                       |
| MSSA+                               | 33 (40.2)                  | 17 (41.5)                        | 16 (39.0)                      |
| USA 300                             | 36 (30.5)                  | 23 (37.1)                        | 13 (23.2)                      |
| Non-USA 300                         | 46 (39.0)                  | 24 (38.7)                        | 22 (39.3)                      |
| <b>Location of Lesion, n (%)</b>    |                            |                                  |                                |
| Abdomen/Torso                       | 9 (7.6)                    | 4 (6.5)                          | 5 (8.9)                        |
| Arm                                 | 8 (6.8)                    | 5 (8.1)                          | 3 (5.4)                        |
| Axilla                              | 20 (17.0)                  | 10 (16.1)                        | 10 (17.9)                      |
| Back                                | 4 (3.4)                    | 2 (3.2)                          | 2 (3.6)                        |
| Breast                              | 1 (0.9)                    | 1 (1.6)                          | 0 (0)                          |
| Buttock                             | 16 (13.6)                  | 7 (11.3)                         | 9 (16.1)                       |
| Foot/Ankle                          | 15 (12.7)                  | 6 (9.7)                          | 9 (16.1)                       |
| Groin                               | 5 (4.2)                    | 2 (3.2)                          | 3 (5.4)                        |
| Hand/Finger                         | 9 (7.6)                    | 4 (6.5)                          | 5 (8.9)                        |

|                                              |             |             |             |
|----------------------------------------------|-------------|-------------|-------------|
| Head/Neck                                    | 10 (8.5)    | 6 (9.7)     | 4 (7.1)     |
| Lower Leg                                    | 11 (9.3)    | 9 (14.5)    | 2 (3.6)     |
| Thigh                                        | 10 (8.5)    | 6 (9.7)     | 4 (7.1)     |
| Size, n (%)                                  |             |             |             |
| 0–5 cm                                       | 95 (89.6)   | 49 (86.0)   | 46 (93.9)   |
| >5 to 10 cm                                  | 8 (7.6)     | 6 (10.5)    | 2 (4.1)     |
| >10 to 15 cm                                 | 2 (1.9)     | 2 (3.5)     | 0 (0)       |
| over 15 cm                                   | 1 (0.9)     | 0 (0)       | 1 (2.0)     |
| Mean (SD)                                    | 4.05 ± 2.55 | 3.14 ± 2.83 | 3.64 ± 2.71 |
| Median (IQR)                                 | 4 (3, 5)    | 3 (2, 4)    | 3 (2, 4)    |
| Signs/Symptoms, n (%)                        |             |             |             |
| Redness                                      | 108 (91.5)  | 57 (91.9)   | 51 (91.1)   |
| Swelling                                     | 106 (89.8)  | 55 (88.7)   | 51 (91.1)   |
| Warmth                                       | 90 (76.3)   | 48 (77.4)   | 42 (75.0)   |
| Pain/Tenderness                              | 109 (92.4)  | 58 (93.6)   | 51 (91.1)   |
| Complaint of “Spider Bite”                   | 5 (4.2)     | 4 (6.5)     | 1 (1.8)     |
| Lesion Type, n (%)                           |             |             |             |
| Folliculitis                                 | 10 (8.5)    | 6 (9.7)     | 4 (7.1)     |
| Abscess                                      | 91 (77.1)   | 45 (72.6)   | 46 (82.1)   |
| Furuncle/Boil                                | 5 (4.2)     | 2 (3.2)     | 3 (5.4)     |
| Carbuncle                                    | 4 (3.4)     | 1 (1.6)     | 3 (5.4)     |
| Cellulitis                                   | 28 (23.7)   | 18 (29.0)   | 10 (17.9)   |
| Purulence, n (%)                             |             |             |             |
| Fluctuance                                   | 71 (60.2)   | 32 (51.6)   | 39 (69.6)   |
| Yellow/White Center                          | 43 (36.4)   | 20 (32.3)   | 23 (41.1)   |
| Central Point or Head                        | 45 (38.1)   | 21 (33.9)   | 24 (42.9)   |
| Draining Pus                                 | 62 (52.5)   | 32 (51.6)   | 30 (53.6)   |
| Possible to aspirate with needle and syringe | 24 (20.3)   | 9 (14.5)    | 15 (26.8)   |
| Follow-Up Visit, n (%)                       |             |             |             |
| Yes                                          | 98 (88.3)   | 50 (87.7)   | 48 (88.9)   |
| Treatment, n (%)                             |             |             |             |
| Incision and Drainage                        | 73 (61.9)   | 35 (56.5)   | 38 (67.9)   |
| Antibiotic prescription                      | 102 (86.4)  | 54 (87.1)   | 48 (85.7)   |
| Both                                         | 61 (51.7)   | 29 (46.8)   | 32 (57.1)   |
| Wound Antibigram (Resistance), n (%)         |             |             |             |
| Ceftaroline                                  | 0 (0)       | 0 (0)       | 0 (0)       |
| Ciprofloxacin                                | 35 (30.4)   | 23 (37.7)   | 12 (22.2)   |
| Clindamycin                                  | 13 (11.3)   | 7 (11.5)    | 6 (11.1)    |
| Erythromycin                                 | 65 (56.5)   | 40 (65.6)   | 25 (46.3)   |
| Gentamicin                                   | 6 (5.2)     | 4 (6.6)     | 2 (3.7)     |
| Levofloxacin                                 | 29 (25.7)   | 18 (30.5)   | 11 (30.4)   |
| Oxacillin                                    | 56 (49.1)   | 40 (66.7)   | 16 (29.6)   |
| Penicillin                                   | 115 (100.0) | 60 (100.0)  | 54 (100.0)  |
| Rifampin                                     | 1 (0.9)     | 0 (0)       | 1 (1.9)     |
| Tetracycline                                 | 7 (6.1)     | 2 (3.3)     | 5 (9.26)    |
| Tigecycline                                  | 0 (0)       | 0 (0)       | 0 (0)       |
| Trimethoprim/Sulfamethoxazole                | 2 (1.7)     | 2 (3.3)     | 0 (0)       |
| Vancomycin                                   | 0 (0)       | 0 (0)       | 0 (0)       |

**Table S5.** Patient reported outcome scores at baseline and six months for the total sample, experimental condition, and control condition.

|                                                       | Total Sample<br>(n = 119)<br>Mean ± SD |                        | Experimental<br>(n = 63)<br>Mean ± SD |                        | Usual Care<br>(n = 56)<br>Mean ± SD |                        | <i>p</i> -Value <sup>a</sup> |
|-------------------------------------------------------|----------------------------------------|------------------------|---------------------------------------|------------------------|-------------------------------------|------------------------|------------------------------|
|                                                       | Baseline<br>(n = 119)                  | Six-months<br>(n = 92) | Baseline<br>(n = 63)                  | Six-months<br>(n = 49) | Baseline<br>(n = 56)                | Six-months<br>(n = 43) |                              |
| Pain Interference                                     | 15.74 ± 7.95                           | 9.17 ± 5.01            | 17.30 ± 8.09                          | 9.42 ± 4.62            | 13.95 ± 7.49                        | 8.87 ± 5.49            | 0.25                         |
| Emotional Distress–<br>Depression Short Form          | 13.40 ± 6.93                           | 11.16 ± 5.51           | 13.74 ± 7.12                          | 11.48 ± 5.24           | 13.00 ± 6.76                        | 10.77 ± 5.88           | 0.96                         |
| Satisfaction with Care                                | 26.62 ± 18.03                          | 25.13 ± 15.48          | 26.35 ± 19.87                         | 25.00 ± 17.66          | 26.89 ± 19.06                       | 25.27 ± 15.72          | 0.93                         |
| Satisfaction with<br>Participation in Social<br>Roles | 25.49 ± 8.50                           | 30.15 ± 6.25           | 24.70 ± 9.06                          | 29.65 ± 6.63           | 26.38 ± 7.82                        | 30.75 ± 5.80           | 0.80                         |
| Prevention Self-<br>Efficacy                          | 33.89 ± 5.01                           | 34.54 ± 5.30           | 34.17 ± 5.62                          | 34.73 ± 5.72           | 33.56 ± 4.27                        | 34.31 ± 4.81           | 0.87                         |
| Decision-making<br>autonomy                           | 84.22 ± 21.31                          | 91.33 ± 14.65          | 85.28 ± 21.06                         | 92.90 ± 13.91          | 83.04 ± 21.78                       | 89.35 ± 15.51          | 0.72                         |
| Infection Prevention<br>and Hygiene Behaviors         | 5.1 ± 1.17                             | 4.64 ± 0.90            | 5.06 ± 1.14                           | 4.63 ± 1.06            | 5.21 ± 1.21                         | 4.64 ± 0.67            | 0.32                         |

Note: <sup>a</sup>*p*-value refers to dependent *t*-tests examining changes over time (baseline-six-month follow up) by condition (experimental versus control).

**Table S6.** Measures, data sources and time points <sup>a</sup>.

| Construct/Topic                        |                                               | Measure/Instrument                                                                                                                                               | Data Source                     | Time Point        |
|----------------------------------------|-----------------------------------------------|------------------------------------------------------------------------------------------------------------------------------------------------------------------|---------------------------------|-------------------|
| <b>Primary Outcome</b>                 |                                               |                                                                                                                                                                  |                                 |                   |
| <b>A</b>                               | Recurrence                                    | Chart Review, Clinical Response Questionnaire [1]                                                                                                                | EHR, Survey                     | T4                |
| <b>Secondary/Intermediate Outcomes</b> |                                               |                                                                                                                                                                  |                                 |                   |
| <b>B</b>                               | Pain Interference                             | PROMIS Adult Pain Interference [2]                                                                                                                               | Survey                          | T0, T4            |
| <b>C</b>                               | Depression                                    | PROMIS Adult Depression Short Form [3]                                                                                                                           | Survey                          | T0, T4            |
| <b>D</b>                               | Quality of Life                               | Quality of Life Scale, Medical Outcomes Trust [4]                                                                                                                | Survey                          | T0                |
| <b>E</b>                               | Satisfaction with Care                        | AHRQ CAHPS 2.0 12-month 4pt Scale [5]                                                                                                                            | Survey                          | T0, T4            |
| <b>F</b>                               | Household<br>Contamination                    | Microbiologic Data (culture, sensitivity), Environmental<br>Surface Contamination and Household Member<br>Colonization [6]                                       | Laboratory,<br>Survey           | T1, T3            |
| <b>G</b>                               | Household<br>Transmission                     | Index Patient Household Member SSTI Report, Household<br>Member SSTI History [7]                                                                                 | Survey                          | T1, T3, T4        |
| <b>Co-variates, Effect Moderators</b>  |                                               |                                                                                                                                                                  |                                 |                   |
| <b>H</b>                               | Bacterial Genotype and<br>Phenotype           | Dermatological Symptoms Instrument [1] Molecular Data<br>( <i>Spa</i> , <i>MLST</i> , <i>mecA</i> , <i>SCCmec</i> , <i>ACME</i> , <i>pvl</i> , <i>mupA</i> ) [6] | Laboratory,<br>Clinician Report | T0, T1, T3        |
| <b>I</b>                               | Infection Prevention<br>and Hygiene Behaviors | Personal Hygiene Score [7]                                                                                                                                       | Survey                          | T1, T2, T3,<br>T4 |



|          |                                                  |                                                                    |        |            |
|----------|--------------------------------------------------|--------------------------------------------------------------------|--------|------------|
| <b>J</b> | Household Crowding                               | Household Crowding Index [7,8]                                     | Survey | T1, T3     |
| <b>K</b> | Household Sharing<br>Social Network and          | Household Sharing Index [9]                                        | Survey | T0, T1, T3 |
| <b>L</b> | Environmental<br>Exposures                       | Social and Environmental Exposures Questionnaire                   | Survey | T0         |
| <b>M</b> | Prevention Self-Efficacy                         | Generalized Self-Efficacy Scale [9,10]                             | Survey | T0, T4     |
| <b>N</b> | Decision-making<br>autonomy<br>Satisfaction with | O'Connor AM. User Manua—Decision Self-Efficacy [11]                | Survey | T0, T4     |
| <b>O</b> | Participation in Social<br>Roles                 | PROMIS Satisfaction with Social Roles and Activities [12]          | Survey | T0, T4     |
| <b>P</b> | Overall Medication<br>Adherence                  | Morisky 8-Item Medication Adherence Questionnaire,<br>Adapted [13] | Survey | T0, T2, T4 |
| <b>Q</b> | Modified Morisky-<br>Mupirocin Adherence         | Morisky 8-Item Medication Adherence Questionnaire,<br>Adapted [13] | Survey | T0, T2     |
| <b>R</b> | Modified Morisky-<br>Chlorhexidine<br>Adherence  | Morisky 8-Item Medication Adherence Questionnaire,<br>Adapted [13] | Survey | T0, T2     |

Note: T0 and T1 = baseline; T2 = one month post T1; T3 = three months post T1; T4 = 6 months post T1. <sup>a</sup>  
Information reflects a combination of details from cited sources as well adapted versions. A certified translation service provided forward- and back-translation on measures that were not available in Spanish.

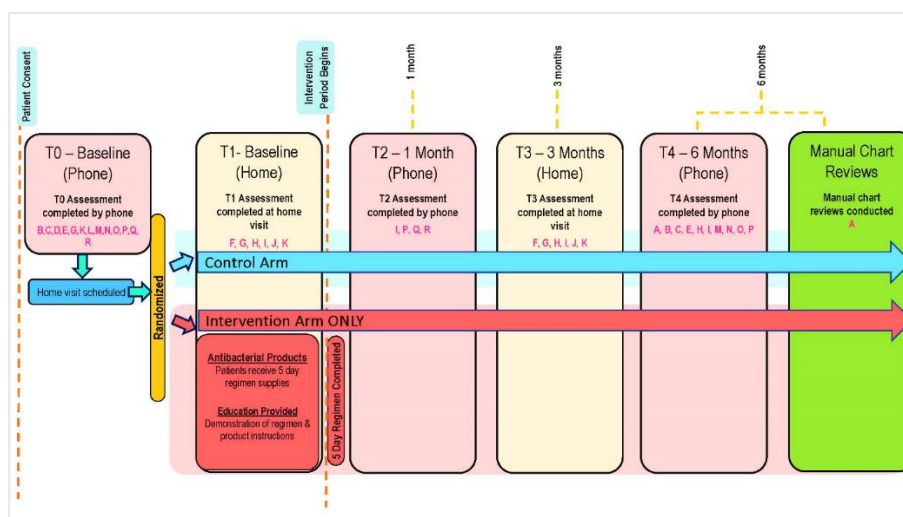

**Figure S1.** Study procedures and timeline. \* Letters refer to measures described in Table S6.

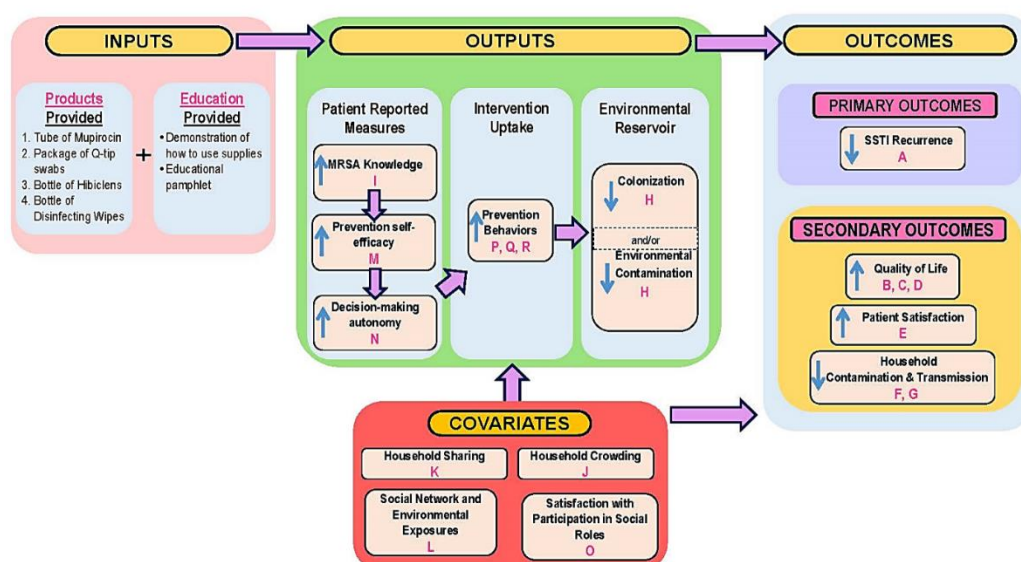

**Figure S2.** Conceptual model. \* Letters refer to measures described in Table S6.

## Reference

- Forcade, N.A.; Parchman, M.L.; Jorgensen, J.H.; Du, L.C.; Nyren, N.R.; Trevino, L.B.; Pena, J.; Mann, M.W.; Munoz, A.; Trevino, S.B.; et al. Prevalence, severity, and treatment of community-acquired methicillin-resistant *Staphylococcus aureus* (CA-MRSA) skin and soft tissue infections in 10 medical clinics in Texas: A South Texas Ambulatory Research Network (STARNet) study. *J. Am. Board Fam. Med.* **2011**, *24*, 543–550.
- Amtmann, D.A.; Cook, K.F.; Jensen, M.P.; Chen, W.-H.; Choi, S.W.; Revicki, D.; Cella, D.; Rothrock, N.; Keefe, F.; Callahan, L.; et al. Development of a PROMIS item bank to measure pain interference. *Pain* **2010**, *146*, 173–182.
- Pilkonis, P.A.; Yu, L.; Dodds, N.E.; Johnston, K.L.; Maihoefer, C.C.; Lawrence, S.M. Validation of the depression item bank from the Patient-Reported Outcomes Measurement Information System (PROMIS) in a three-month observational study. *J. Psychiatr. Res.* **2014**, *56*, 112–119.
- Ware, J.E., Jr.; Sherbourne, C.D. The MOS 36-item short-form health survey (SF-36). I. Conceptual framework and item selection. *Med. Care* **1992**, *30*, 473–483.
- Agency for Healthcare Research and Quality. CAHPS Clinician & Group 12-Month Survey 2.0. Published 2017. Accessed February 2, 2019. <http://www.ahrq.gov/cahps/surveys-guidance/cg/12-month/index.html>
- Pardos de la Gandara, M.; Raygoza Garay, J.A.; Mwangi, M.; Tobin, J.N.; Tsang, A.; Khalida, C.; D’Orazio, B.; Kost, R.G.; Leinberger-Jabari, A.; Coffran, C.; et al. Molecular types of methicillin-resistant *Staphylococcus aureus* and methicillin-sensitive *Staphylococcus aureus* strains causing skin and soft tissue infections and

- nasal colonization, identified in community health centers in New York City. *J. Clin. Microbiol.* **2015**, *53*, 2648–2658.
7. Miller, L.G.; Quan, C.; Shay, A.; Mostafaie, K.; Bharadwa, K.; Tan, N.; Matayoshi, K.; Cronin, J.; Tan, J.; Tagudar, G.; et al. A prospective investigation of outcomes after hospital discharge for endemic, community-acquired methicillin-resistant and -susceptible *Staphylococcus aureus* skin infection. *Clin. Infect. Dis.* **2007**, *44*, 483–492.
  8. Melki, I.S.; Beydoun, H.A.; Khogali, M.; Tamim, H.; Yunis, K.A. Household crowding index: A correlate of socioeconomic status and inter-pregnancy spacing in an urban setting. *J. Epidemiol. Community Health* **2004**, *58*, 476–480.
  9. Jones, D.L.; Ishii Owens, M.; Lydston, D.; Tobin, J.N.; Brondolo, E.; Weiss, S.M. Self-efficacy and distress in women with AIDS: The SMART/EST women's project. *AIDS Care* **2010**, *22*, 1499–1508.
  10. Schwarzer, R.; Jerusalem, M. Generalized Self-Efficacy Scale. In *Measures in Health Psychology: A User's Portfolio*; NFER-Nelson: Windsor, UK, 1995; pp. 35–37.
  11. O'Connor, A.M. *User Manual—Decision Self-Efficacy Scale*; Ottawa Hospital Research Institute: Ottawa, ON, Canada, 1995.
  12. Hahn, E.A.; DeWalt, D.A.; Bode, R.K.; Garcia, S.F.; DeVellis, R.F.; Correia, H.; Cella, D. New English and Spanish social health measures will facilitate evaluating health determinants. *Health Psychol.* **2014**, *33*, 490–499.
  13. Morisky, D.E.; Green, L.W.; Levine, D.M. Concurrent and predictive validity of a self-reported measure of medication adherence. *Med. Care* **1986**, *24*, 67–74.
